# Supplementary material for: Compact way to generate guide star for wavefront sensing in Bessel two-photon microscopy
Source: Research Square preprint supplement (doi:10.21203/rs.3.rs-6562186/v1), 2025-05-22
Supplement: Supplementary file 1 [file 28e5e31743c2380e8e1a77b1.docx]

**Focal AO correction with Non-** **conjugated SLM and WFS**

As shown in Fig. S1, the sample-induced aberration ΦS is measured by the wavefront sensor (WFS) at a plane conjugate to the pupil plane of the objective (IO). However, the spatial light modulator (SLM) is not conjugated to the IO’s pupil plane but rather to its focal plane. ‌**This geometric mismatch**‌ means the SLM and WFS reside in non-conjugate planes; thus, ΦS cannot be directly corrected by simply superimposing its inverse phase (-ΦS) onto the SLM, as is typical in conventional adaptive optics (AO) systems.

Fig. S1. Principle of focal AO correction.

Consider first the scenario ‌**without aberrations‌**: When the SLM is modulated with an arbitrary phase Φ (whether an axicon phase ΦB or a thin-lens phase ΦL), the electric field of the light reflected from the SLM can be expressed as:

Where *Ein* represents the incident Gaussian beam with waist radius ω:

The electric field *E1* at the front focal plane of lens L is then determined by ‌**Fresnel diffraction‌** of *E0* over a propagation distance s:

Subsequently, the electric field *Ep* at the pupil plane of the IO (coinciding with the rear focal plane of lens L) is calculated through a ‌2D Fourier transform‌ of *E1*:

Given that the sample-induced aberration ΦS is measured by the WFS at a plane conjugate to the IO’s pupil plane, the ‌aberration-corrected electric field‌ at the pupil plane must incorporate a phase compensation term. This is achieved by subtracting ΦS from the phase of *Ep*, yielding:

To derive the required field for aberration correction at the SLM, the process is reversed:

1) The corrected field at the front focal plane of lens L is obtained via an ‌inverse Fourier transform‌ of :

2) The corresponding field at the SLM plane is calculated through ‌reverse Fresnel diffraction‌ of over distance -*s*:

Since the SLM modulates ‌only phase‌ (not amplitude), the applied correction pattern is derived from the phase component of :

For any initial phase Φ (ΦB or ΦL), *Ep* can be precomputed using Eq. (1) ~ (4). Upon detection of ΦS by the WFS, the SLM correction phase is computed via Eq. (5) ~ (8). The final SLM pattern simultaneously achieve beam shaping and aberration correction.
